# Supplementary material for: Double Trouble: The Burden of Child-rearing and Working on Maternal Mortality
Source: Springer Nature journal article supplement (doi:10.1007/s13524-020-00868-6), 2020-04-01
Supplement: MOESM1 [file 17880270]

# Double trouble: The burden of child rearing and working on maternal mortality

## Online Appendix

Tabea Bucher-Koenen, Helmut Farbmacher  
Raphael Guber, Johan Vikström

September 6, 2019

| Outcome            | (1)<br>Resident<br>in 1990 | (2)<br>Died betw.<br>1961–1990 | (3)<br>Education<br>(ordered logit) | (4)<br>Pension at age<br>72 missing | (5)<br>Pension at age<br>72 in 100 SEK |
|--------------------|----------------------------|--------------------------------|-------------------------------------|-------------------------------------|----------------------------------------|
| twins              | 0.005<br>(0.005)           | -0.004<br>(0.004)              | -0.014<br>(0.037)                   | 0.006<br>(0.005)                    | -0.716<br>(9.627)                      |
| same-sex twins     | 0.005<br>(0.006)           | -0.005<br>(0.005)              | 0.046<br>(0.046)                    | 0.006<br>(0.006)                    | -10.162<br>(11.632)                    |
| Unconditional mean | 0.914                      | 0.065                          | 2.224                               | 0.446                               | 817.846                                |
| Observations       | 444,197                    | 444,197                        | 404,286                             | 404,286                             | 209,325                                |

In columns 1,2,4 and 5, each coefficient-standard error pair comes from a single regression of a linear probability model controlling for education, cohort dummies and a quadratic polynomial in age at first birth. Column 3 uses education in seven levels as outcome, is estimated using an ordered logit model and controls for cohort dummies and a quadratic polynomial in age at first birth. Robust standard errors in parentheses below. \*\*\*, \*\*, \* indicate significance at the 1%, 5%, and 10% level, respectively.

Table A1: Selection into different samples

|                                       | (1)                | (2)                |
|---------------------------------------|--------------------|--------------------|
|                                       | All twins          | Same-sex twins     |
| # children 5 years after first birth  | 0.68***<br>(0.012) | 0.69***<br>(0.015) |
| # children 10 years after first birth | 0.61***<br>(0.017) | 0.61***<br>(0.021) |
| # children 15 years after first birth | 0.59***<br>(0.019) | 0.59***<br>(0.023) |
| Total # children                      | 0.59***<br>(0.020) | 0.59***<br>(0.025) |

Note: Table displays linear probability models controlling for education, cohort dummies and a quadratic polynomial in age at first birth. Robust standard errors in parentheses below. \*\*\*, \*\*, \* indicate significance at the 1%, 5%, and 10% level, respectively.

Table A2: Twin births and the number of children

|                                        | (1)          | (2)              |
|----------------------------------------|--------------|------------------|
|                                        | Twin parents | Non-twin parents |
| Spacing between first and second child | 0            | 4.00             |
| Spacing between first and last child   | 3.80         | 7.38             |
| Spacing between second and last child  | 3.80         | 3.37             |

Note: Twin parents defined by twinning at first birth. Sample statistics for the sample as described in Section 2.

Table A3: Twin births and child spacing (averages in years)

|                                | (1)<br>Died between<br>1991 and 2010 | (2)<br>Lung cancer/<br>COPD | (3)<br>Heart attack/<br>stroke | (4)<br>Died between<br>1991 and 2010 | (5)<br>Lung cancer/<br>COPD | (6)<br>Heart attack/<br>stroke |
|--------------------------------|--------------------------------------|-----------------------------|--------------------------------|--------------------------------------|-----------------------------|--------------------------------|
| <b>Panel A: All twins</b>      |                                      |                             |                                |                                      |                             |                                |
| Twins                          | 0.027**<br>(0.012)                   | 0.018***<br>(0.006)         | 0.021**<br>(0.010)             | 0.027**<br>(0.012)                   | 0.018***<br>(0.006)         | 0.020**<br>(0.010)             |
| Twins                          | 0.004<br>(0.020)                     | -0.021**<br>(0.009)         | -0.021<br>(0.015)              | 0.006<br>(0.020)                     | -0.021**<br>(0.009)         | -0.019<br>(0.015)              |
| × upper secondary schooling    | 0.057**<br>(0.026)                   | 0.004<br>(0.012)            | 0.020<br>(0.019)               | 0.054**<br>(0.026)                   | 0.004<br>(0.012)            | 0.021<br>(0.019)               |
| × tertiary schooling           |                                      |                             |                                |                                      |                             |                                |
| <b>Panel B: Same-sex twins</b> |                                      |                             |                                |                                      |                             |                                |
| Same-sex twins                 | 0.027*<br>(0.015)                    | 0.019**<br>(0.008)          | 0.023*<br>(0.012)              | 0.027*<br>(0.015)                    | 0.020**<br>(0.008)          | 0.022*<br>(0.012)              |
| Same-sex twins                 | 0.000<br>(0.024)                     | -0.024**<br>(0.011)         | -0.026<br>(0.018)              | 0.024<br>(0.024)                     | -0.024**<br>(0.011)         | -0.024<br>(0.018)              |
| × upper secondary schooling    | 0.072**<br>(0.032)                   | 0.001<br>(0.015)            | 0.032<br>(0.024)               | 0.067**<br>(0.032)                   | 0.000<br>(0.015)            | 0.032<br>(0.024)               |
| × tertiary schooling           |                                      |                             |                                |                                      |                             |                                |
| Control for income             | no                                   | no                          | no                             | yes                                  | yes                         | yes                            |
| Unconditional mean             | 0.287                                | 0.044                       | 0.136                          | 0.287                                | 0.044                       | 0.136                          |
| Observations                   | 404,286                              | 404,286                     | 404,286                        | 404,286                              | 404,286                     | 404,286                        |

Note: Table displays linear probability models controlling for finer levels of education, cohort dummies and a quadratic polynomial in age at first birth. Columns 4 to 6 additionally control for a quadratic polynomial in log-labor market income in 1985. Individuals with zero income in 1985 are assigned a value of zero. The reference group are mothers with primary education. Robust standard errors in parentheses below. \*\*\*, \*\*, \* indicate significance at the 1%, 5%, and 10% level, respectively.

Table A4: Interaction model for education

|                                                     | (1)<br>Died between<br>1991 and 2010 | (2)<br>Lung cancer/<br>COPD | (3)<br>Heart attack/<br>stroke |
|-----------------------------------------------------|--------------------------------------|-----------------------------|--------------------------------|
| <b>Panel A: All twins</b>                           |                                      |                             |                                |
| Twins                                               | 0.010<br>(0.012)                     | 0.002<br>(0.005)            | 0.005<br>(0.010)               |
| Twins $\times$ above median pension income          | 0.037*<br>(0.009)                    | 0.015*<br>(0.009)           | 0.015<br>(0.014)               |
| <b>Panel B: Same-sex twins</b>                      |                                      |                             |                                |
| Same-sex twins                                      | 0.019<br>(0.016)                     | 0.006<br>(0.007)            | 0.004<br>(0.011)               |
| Same-sex twins $\times$ above median pension income | 0.031<br>(0.024)                     | 0.009<br>(0.012)            | 0.034*<br>(0.018)              |
| Unconditional mean                                  | 0.287<br>404,286                     | 0.044<br>404,286            | 0.136<br>404,286               |
| Observations                                        |                                      |                             |                                |

Note: Table displays linear probability models controlling for finer levels of education, cohort dummies and a quadratic polynomial in age at first birth. The reference group are mothers with primary education. Robust standard errors in parentheses below. \*\*\*, \*\*, \* indicate significance at the 1%, 5%, and 10% level, respectively.

Table A5: Interaction model for pension income

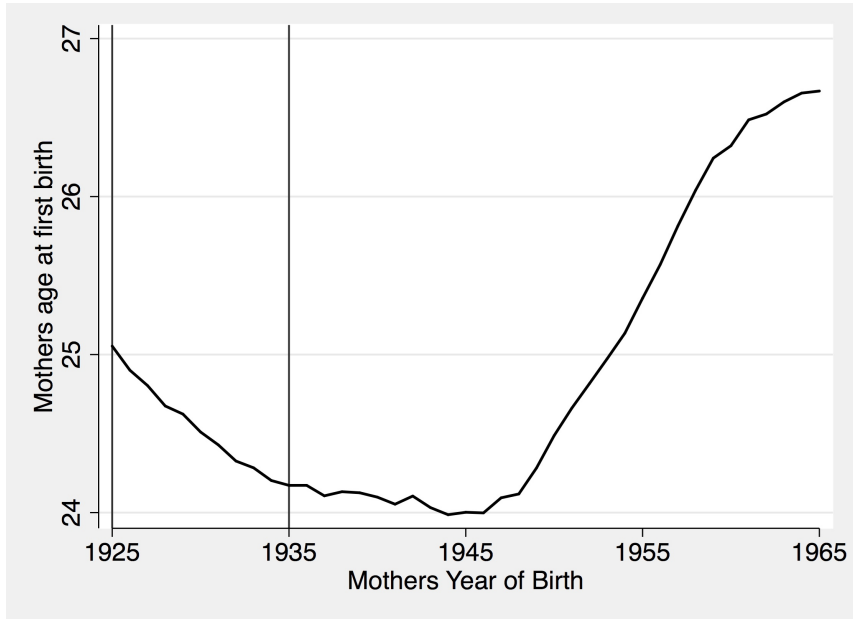

Figure A1: Average age of a mother at first birth

**Note:** The vertical lines indicate the mothers in our sample.

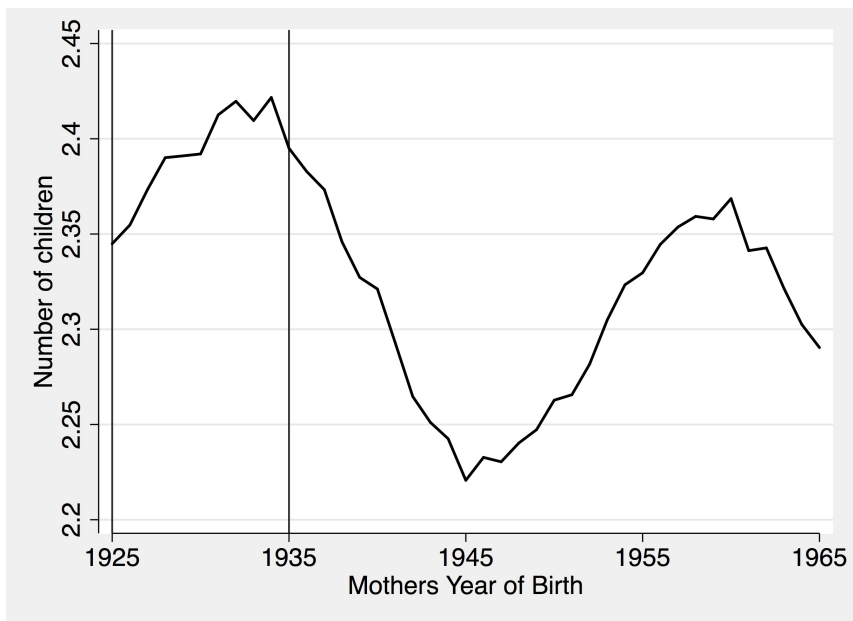

Figure A2: Number of children per woman

**Note:** The vertical lines indicate the mothers in our sample.

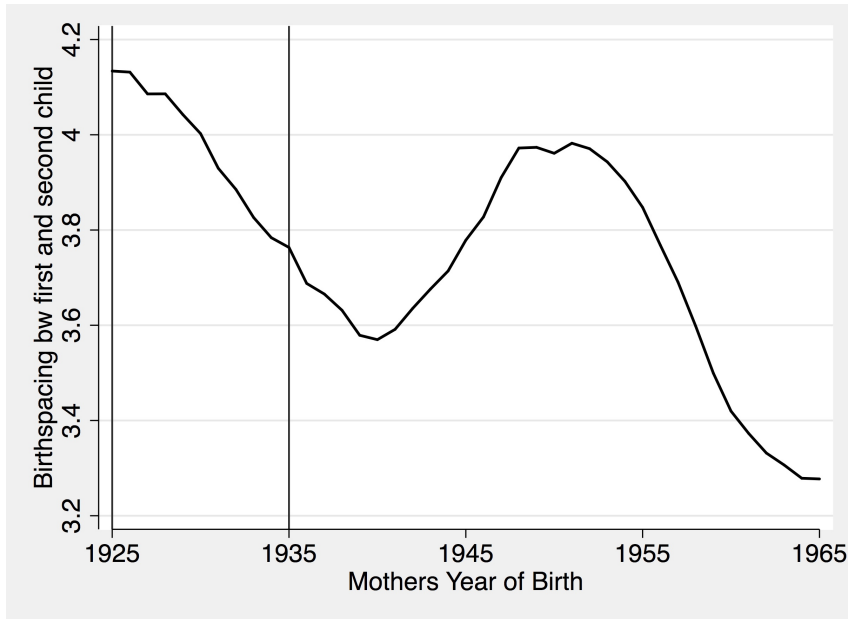

Figure A3: Birth spacing (in years) between first and second child

**Note:** The vertical lines indicate the mothers in our sample.

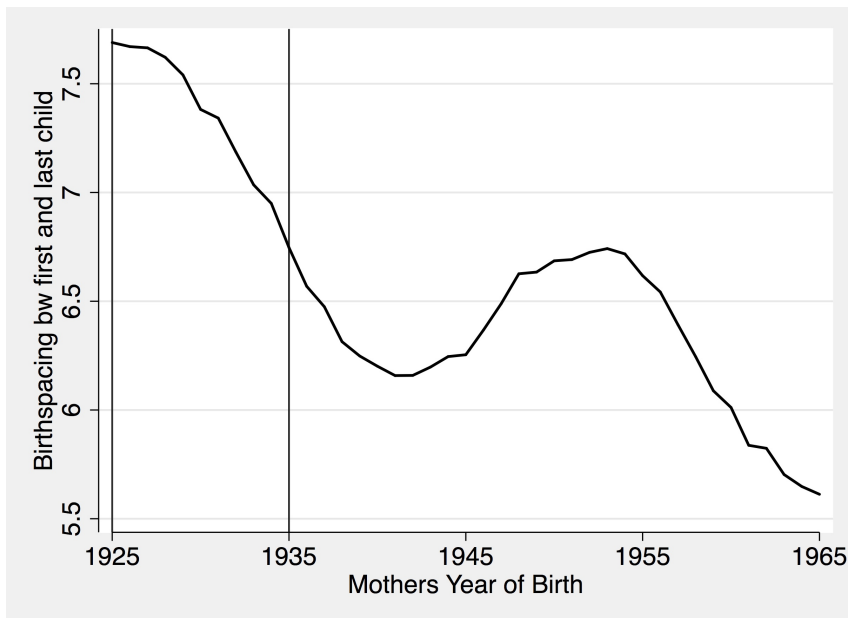

Figure A4: Birth spacing (in years) between first and last child

**Note:** The vertical lines indicate the mothers in our sample.
